# Supplementary material for: Formation of Alginate/Chitosan Interpenetrated Networks Revealed by EPR Spectroscopy
Source: MDPI journal article supplement (doi:10.3390/gels9030231), 2023-03-16
Supplement: s1 [file s1]

*Supplementary Material*

# Formation of Alginate/Chitosan Interpenetrated Networks Revealed by EPR Spectroscopy

Jean-Patrick Joly <sup>1</sup>, Ludmila Aricov <sup>2,\*</sup>, George-Alin Balan <sup>2</sup>, Elena Irina Popescu <sup>2</sup>, Sorin Mocanu <sup>2</sup>, Anca Ruxandra Leonties <sup>2</sup>, Iulia Matei <sup>2</sup>, Sylvain R. A. Marque <sup>1</sup> and Gabriela Ionita <sup>2,\*</sup>

<sup>1</sup> Aix Marseille University, CNRS, Institut de Chimie Radicale, UMR 7273, Case 551, Avenue Escadrille Normandie-Niemen, CEDEX 20, 13397 Marseille, France

<sup>2</sup> “Ilie Murgulescu” Institute of Physical Chemistry of the Romanian Academy, 202 Splaiul Independentei, 060021 Bucharest, Romania

\* Correspondence: laricov@icf.ro (L.A.); gabi2ionita@yahoo.com or ige@icf.ro (G.I.)

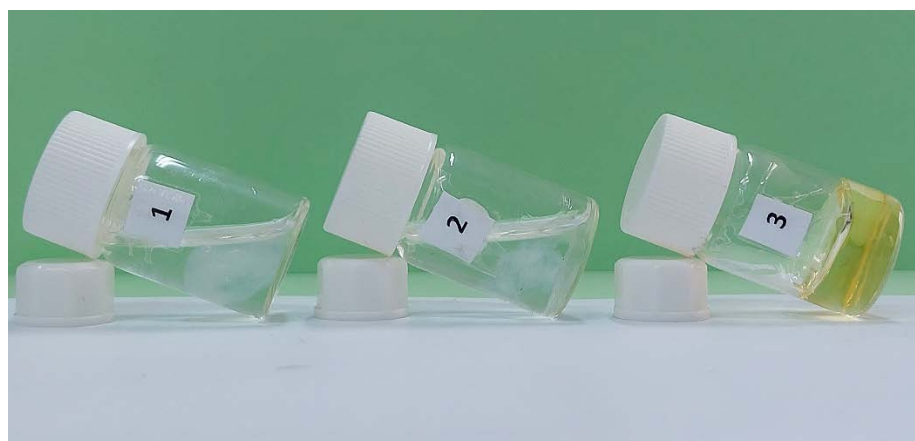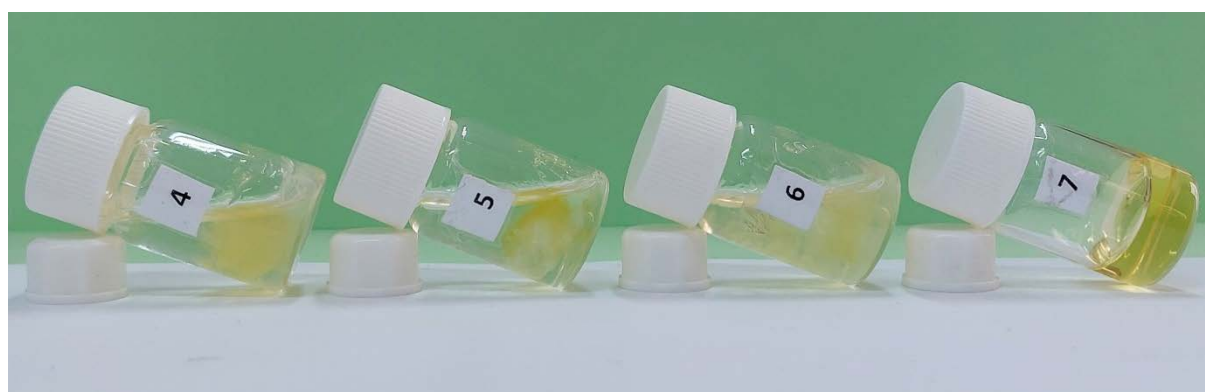

**Figure S1.** Images of systems 1-7 investigated in this study.

**Table S1.** Assignment of the main vibrational modes of alginate and chitosan gels.

| <b>Gel.</b> | <b>Wavenumber (cm<sup>-1</sup>)<sup>a</sup></b> | <b>Assignment<sup>b</sup></b>                                    |
|-------------|-------------------------------------------------|------------------------------------------------------------------|
| alginate_Ca | 3350 (s), 3240 (sh), broad                      | v(O–H), hydrogen bonded                                          |
|             | 1603 (s), 1625 (sh)                             | v <sub>a</sub> (COO <sup>-</sup> )                               |
|             | 1425                                            | v <sub>s</sub> (COO <sup>-</sup> )                               |
|             | 1334                                            | δ(C–C–H) + δ(O–C–H)                                              |
|             | 1146; 1114 (w)                                  | v(C–O) + v(C–C) + v(C–OVC)                                       |
|             | 1079; 1024, 1013                                | v(C–O) + v(C–C) + δ(C–C–C)                                       |
|             | 963, 940 (w)                                    | v(C–O) + v(C–C) + δ(C–C–O) (M+G)                                 |
|             | 888 (w)                                         | δ(C–H) (M+G)                                                     |
|             | 821                                             | δ(C–C–O) + δ(C–C–H) (M)                                          |
| chitosan_GA | 3390 (s), broad                                 | v(N–H), v(O–H), hydrogen bonded                                  |
|             | 2945, 2873                                      | v(C–H)                                                           |
|             | 1717                                            | v(C=O) unreacted GA [R1]                                         |
|             | 1646, broad                                     | v(C=N) crosslink with GA +<br>+ v(C=O) residual acetyl (amide I) |
|             | 1460, 1442                                      | v(C–N) + δ(C–H) in –CH <sub>3</sub>                              |
|             | 1353                                            | δ(C–H) in –CH <sub>2</sub> –                                     |
|             | 1258 (w)                                        | v(C–O–C)                                                         |
|             | 1198, 1187                                      | δ(C–O–C)                                                         |
|             | 1144, 1104 (s), 1063, 1005, 1019, 936 (s),      | v(C–O) + v(C–C) + v(C–H) + v(–CH <sub>2</sub> –OH)               |
|             | 895, 857, 806                                   | skeletal vibrations polysaccharide                               |

Note: <sup>a</sup> s, strong; sh, shoulder; w, weak; <sup>b</sup> v, stretching (a – asymmetric, s – symmetric); δ, deformation (bending); M – β-D-mannuronic acid; G – α-L-guluronic acid.

**Table S2.** The EPR parameters of ChitT in chitosan solution, in a solution of alginate and chitosan, and in gel samples 1–7.

| Sample         | $T \times 10^{10}$ (s) | $2a_N$ (G) |
|----------------|------------------------|------------|
| ChitT_Chit     | 2.28                   | 34.17      |
| ChitT_Alq+Chit | 0.85                   | 34.25      |
| ChitT_1        | 3.30                   | 34.30      |
| ChitT_2        | 3.98                   | 34.30      |
| ChitT_3        | 17.8                   | 34.25      |
| ChitT_4        | 6.51                   | 34.23      |
| ChitT_7        | 32.75                  | 33.92      |
